# Supplementary material for: Internet Health Information Seeking and the Patient-Physician Relationship: A Systematic Review
Source: PubMed Central journal article supplement (PMC5290294; doi:10.2196/jmir.5729), 2017-01-19
Supplement: jmir_v19i1e9_app1.pdf [file jmir_v19i1e9_app1.pdf]

**Multimedia Appendix 1: CASP (Critical Appraisal Skills Program) quality assessment for qualitative studies<sup>a</sup>**

| No                              | Question                                                                                                                                   | Stevenson et al.[3] | Kivits [4] | Broom [7] | [12]Sommerhalder et al. | Sillence, et al. [23] | Silver [25] | Hart et al. [26] | Schrank, et al. [27] | Chiu [30] | Xie [35] |
|---------------------------------|--------------------------------------------------------------------------------------------------------------------------------------------|---------------------|------------|-----------|-------------------------|-----------------------|-------------|------------------|----------------------|-----------|----------|
| 1                               | Was there a clear statement of the aims of the research?                                                                                   | 1                   | 1          | 1         | 1                       | 1                     | 1           | 1                | 1                    | 1         | 1        |
| 2                               | Is a qualitative methodology appropriate?                                                                                                  | 1                   | 1          | 1         | 1                       | 1                     | 1           | 1                | 1                    | 1         | 1        |
| 3                               | Was the research design appropriate to address the aims of the research?                                                                   | 1                   | 1          | 1         | 1                       | 1                     | 1           | 1                | 1                    | 1         | 1        |
| 4                               | Was the recruitment strategy appropriate to the aims of the research?                                                                      | 1                   | 1          | 1         | 1                       | 1                     | 1           | 0                | 1                    | 1         | 1        |
| 5                               | Was the data collected in a way that addressed the research issue?                                                                         | 1                   | 1          | 1         | 1                       | 1                     | 1           | 1                | 1                    | 1         | 1        |
| 6                               | Has the relationship between researcher and participants been adequately considered?                                                       | 0                   | 0          | 0         | 0                       | 0                     | 0           | 0                | 0                    | 0         | 0        |
| 7                               | Have ethical issues been taken into consideration?                                                                                         | 1                   | 0          | 1         | 1                       | 0                     | 0           | 1                | 1                    | 0         | 0        |
| 8                               | Was the data analysis sufficiently rigorous?                                                                                               | 1                   | 1          | 1         | 1                       | 1                     | 1           | 1                | 1                    | 1         | 1        |
| 9                               | Is there a clear statement of findings?                                                                                                    | 1                   | 1          | 1         | 1                       | 1                     | 1           | 1                | 1                    | 1         | 1        |
| <b>Outcomes of the research</b> |                                                                                                                                            |                     |            |           |                         |                       |             |                  |                      |           |          |
| 10i                             | Researcher(s) have discussed the contribution of the study to the existing knowledge or understanding:                                     | 1                   | 1          | 1         | 1                       | 1                     | 1           | 1                | 1                    | 1         | 1        |
| 10ii                            | Researcher(s) have identified new areas where research is necessary:                                                                       | 1                   | 1          | 0         | 1                       | 1                     | 1           | 1                | 1                    | 0         | 1        |
| 10ii i                          | Paper has addressed whether or how the findings can be transferred to other populations or considered other ways the research may be used: | 1                   | 0          | 0         | 1                       | 1                     | 1           | 1                | 1                    | 1         | 1        |
|                                 | <b>Quality score<sup>b</sup></b>                                                                                                           | 0.9<br>2            | 0.7<br>5   | 0.7<br>5  | 0.9<br>2                | 0.8<br>3              | 0.8<br>3    | 0.8<br>3         | 0.9<br>2             | 0.7<br>5  | 0.8<br>3 |

a: The results presented in the table are after resolving the disagreements between two researchers

b: Yes = 1, No = 0 and Can't tell = 0, the total score was calculated based on the proportion of 'Yes'
